# Supplementary material
Source: PubMed Central journal article supplement (PMC2292420)
Supplement: 125_2008_950_MOESM2_ESM.pdf [file 125_2008_950_MOESM2_ESM.pdf]

**ESM Table 2 Individual follow-up data for primary outcome variable (HbA<sub>1c</sub>) and active programme participation**

| Participant ID | HbA <sub>1c</sub> (%) |      |      |      |     | Time in BrW programme (months) | Participant ID | HbA <sub>1c</sub> (%) |      |     |     |      | Time in MF programme (months) |
|----------------|-----------------------|------|------|------|-----|--------------------------------|----------------|-----------------------|------|-----|-----|------|-------------------------------|
|                | T0                    | T3   | T6   | T9   | T12 |                                |                | T0                    | T3   | T6  | T9  | T12  |                               |
| BrW01          | 7.1                   | 7.2  |      |      |     | 0                              | MF01           | 6.3                   | 6.3  | 6.3 |     | 6.3  | 0                             |
| BrW02          | 9.9                   |      |      |      |     | 0                              | MF02           | 6.6                   |      |     |     |      | 0                             |
| BrW03          | 11.1                  | 7.6  |      |      |     | 0                              | MF03           | 7.8                   | 8.6  | 9.2 | 6.5 |      | 0                             |
| BrW04          | 7.0                   | 6.8  | 6.7  | 7.9  | 6.3 | 0                              | MF04           | 6.5                   |      |     |     |      | 0                             |
| BrW05          | 6.3                   | 6.5  | 6.7  | 6.4  | 6.4 | 0                              | MF05           | 6.3                   |      | 6.2 |     | 6.4  | 0                             |
| BrW06          | 6.6                   | 6.7  | 7.1  | 6.5  | 5.6 | 0                              | MF06           | 6.1                   | 6.5  | 6.8 | 6.7 | 6.6  | 1                             |
| BrW07          | 8.9                   | 6.1  | 9.2  | 9.1  | 9.1 | 1                              | MF07           | 5.7                   | 6.0  |     | 7.1 |      | 2                             |
| BrW08          | 6.6                   | 6.8  | 6.5  | 6.5  | 6.2 | 1                              | MF08           | 6.0                   | 6.0  | 6.2 | 6.3 | 6.4  | 2                             |
| BrW09          | 5.6                   | 5.4  | 5.8  |      |     | 1                              | MF09           | 5.6                   |      |     |     |      | 2                             |
| BrW10          | 7.6                   | 7.9  | 8.1  | 6.2  | 7.1 | 3                              | MF10           | 6.3                   | 6.1  | 6.2 | 6.1 | 6.3  | 3                             |
| BrW11          | 7.0                   | 7.3  | 8.3  | 9.2  | 9.0 | 3                              | MF11           | 7.6                   | 9.2  |     |     | 9.6  | 4                             |
| BrW12          | 7.1                   | 6.8  | 7.2  | 7.2  |     | 4                              | MF12           | 6.6                   | 6.7  | 6.8 |     |      | 5                             |
| BrW13          | 5.9                   | 5.8  | 6.1  | 5.6  | 5.7 | 4                              | MF13           | 7.3                   | 7.5  | 7.5 | 7.7 | 8.2  | 6                             |
| BrW14          | 6.2                   | 6.2  |      | 5.9  | 5.9 | 5                              | MF14           | 6.0                   | 6.1  | 6.4 |     |      | 7                             |
| BrW15          | 6.4                   | 6.1  | 6.3  | 7.2  | 6.4 | 5                              | MF15           | 7.3                   | 7.5  | 7.6 |     | 6.2  | 7                             |
| BrW16          | 6.8                   | 6.9  | 7.1  | 6.7  | 6.7 | 5                              | MF16           | 6.2                   |      |     |     |      | 7                             |
| BrW17          | 6.6                   | 6.4  | 6.3  | 6.7  | 6.9 | 5                              | MF17           | 9.7                   | 9.5  | 8.4 | 8.0 | 7.6  | 8                             |
| BrW18          | 7.4                   | 7.2  | 7.0  | 6.7  | 5.7 | 5                              | MF18           | 6.6                   | 6.5  | 6.2 | 6.5 | 6.2  | 8                             |
| BrW19          | 7.2                   | 7.0  |      | 8.5  |     | 5                              | MF19           | 7.0                   | 6.7  | 6.5 | 6.9 | 6.8  | 8                             |
| BrW20          | 7.1                   | 6.8  | 6.6  | 7.0  |     | 5                              | MF20           | 8.2                   | 8.5  | 7.6 | 7.8 | 7.3  | 9                             |
| BrW21          | 9.1                   | 7.6  |      |      | 7.8 | 6                              | MF21           | 6.1                   | 6.0  | 6.0 | 5.4 | 5.8  | 10                            |
| BrW22          | 7.4                   | 7.8  | 8.8  | 8.7  | 8.4 | 6                              | MF22           | 8.3                   | 6.7  | 6.9 | 7.1 | 7.3  | 11                            |
| BrW23          | 8.9                   | 6.6  | 6.4  | 6.5  | 6.7 | 7                              | MF23           | 10.3                  |      | 9.7 | 9.2 |      | 11                            |
| BrW24          | 11.9                  | 10.9 | 11.1 | 8.3  |     | 7                              | MF24           | 6.7                   | 6.9  |     |     |      | 11                            |
| BrW25          | 7.9                   | 6.4  | 6.6  | 6.9  |     | 8                              | MF25           | 8.0                   | 7.6  | 7.1 | 6.9 | 6.7  | 12                            |
| BrW26          | 6.3                   | 7.4  | 6.7  | 6.0  | 6.6 | 9                              | MF26           | 10.3                  | 10.9 | 9.2 | 9.7 | 10.6 | 12                            |
| BrW27          | 6.1                   | 6.0  | 6.1  | 6.1  |     | 10                             | MF27           | 6.4                   | 6.2  | 6.3 | 6.2 | 6.2  | 12                            |
| BrW28          | 7.1                   | 6.8  | 7.0  | 5.9  | 5.7 | 10                             | MF28           | 6.7                   | 7.0  | 7.2 | 7.4 | 6.9  | 12                            |
| BrW29          | 6.6                   | 6.4  | 6.6  | 6.2  | 6.1 | 10                             | MF29           | 7.8                   | 7.9  | 7.3 | 7.2 | 7.4  | 12                            |
| BrW30          | 8.4                   | 8.9  | 7.0  | 7.1  | 9.5 | 11                             | MF30           | 6.2                   | 6.3  | 6.6 | 6.5 | 6.4  | 12                            |
| BrW31          | 10.4                  | 10.4 | 9.8  | 11.1 |     | 11                             | MF31           | 9.7                   |      | 8.9 |     | 9.0  | 12                            |
| BrW32          | 7.0                   | 7.2  | 7.1  | 7.5  | 7.6 | 12                             | MF32           | 6.1                   |      |     |     | 6.1  | 12                            |
| BrW33          | 6.1                   | 6.1  | 6.2  | 6.4  | 6.0 | 12                             | MF33           | 6.0                   | 6.1  | 6.1 | 5.8 | 5.5  | 12                            |
| BrW34          | 6.0                   | 6.6  | 6.9  | 6.5  | 6.6 | 12                             | MF34           | 6.8                   | 6.2  | 6.4 | 6.4 | 6.3  | 12                            |
| BrW35          | 7.2                   | 7.1  | 7.0  | 7.3  | 7.0 | 12                             | MF35           | 6.4                   | 6.9  | 6.1 | 6.4 | 6.9  | 12                            |
| BrW36          | 6.0                   | 6.0  | 6.0  | 6.3  | 5.9 | 12                             | MF36           | 5.8                   | 5.9  | 6.0 | 5.6 | 5.2  | 12                            |
| BrW37          | 5.5                   | 5.6  | 5.4  | 5.5  | 5.6 | 12                             | MF37           | 6.3                   | 6.4  | 6.2 | 6.0 | 6.1  | 12                            |
| BrW38          | 5.8                   | 5.9  | 5.7  | 6.1  | 6.1 | 12                             | MF38           | 7.6                   | 7.2  | 7.2 | 6.9 | 6.9  | 12                            |
| BrW39          | 6.2                   | 6.2  | 6.1  | 6.1  | 6.2 | 12                             | MF39           | 6.7                   | 7.0  | 6.7 | 6.9 | 6.5  | 12                            |
| BrW40          | 6.8                   | 7.3  | 7.1  | 6.8  | 9.0 | 12                             | MF40           | 10.4                  | 10.5 | 8.9 | 8.8 | 8.1  | 12                            |
| BrW41          | 9.0                   | 9.6  | 9.7  | 7.0  | 6.3 | 12                             | MF41           | 7.0                   | 6.6  | 7.0 | 6.9 | 6.8  | 12                            |
| BrW42          | 6.5                   | 6.5  | 6.2  | 6.5  | 6.9 | 12                             | MF42           | 6.1                   | 6.4  | 6.0 | 5.8 | 5.8  | 12                            |
| BrW43          | 6.3                   | 6.3  | 6.6  | 6.3  | 6.6 | 12                             | MF43           | 6.9                   | 5.8  |     |     | 6.1  | 12                            |
| BrW44          | 6.3                   | 6.0  | 6.3  | 6.3  | 6.7 | 12                             |                |                       |      |     |     |      |                               |
| BrW45          | 7.3                   | 7.4  | 7.6  | 7.7  | 6.6 | 12                             |                |                       |      |     |     |      |                               |
| BrW46          | 5.9                   | 6.2  | 6.1  | 6.1  | 6.8 | 12                             |                |                       |      |     |     |      |                               |
| BrW47          | 6.3                   | 6.3  | 6.4  | 6.3  | 6.2 | 12                             |                |                       |      |     |     |      |                               |
| BrW48          | 7.6                   | 7.9  | 7.6  | 7.5  | 7.9 | 12                             |                |                       |      |     |     |      |                               |
| BrW49          | 5.7                   | 5.8  | 5.9  | 5.8  | 5.8 | 12                             |                |                       |      |     |     |      |                               |
| Mean           | 7.2                   | 6.9  | 7.0  | 6.9  | 6.8 | 7.4                            | Mean           | 7.1                   | 7.1  | 7.1 | 6.9 | 6.9  | 8.1                           |
| SD             | 1.4                   | 1.1  | 1.2  | 1.1  | 1.0 | 4.5                            | SD             | 1.3                   | 1.3  | 1.0 | 1.0 | 1.1  | 4.5                           |

BrW, brisk walking; MF, medical fitness programme; T0, time at baseline; T3, time at 3 months, etc.
